# Supplementary material for: Association of an intact E2 gene with higher HPV viral load, higher viral oncogene expression, and improved clinical outcome in HPV16 positive head and neck squamous cell carcinoma
Source: PLoS One. 2018 Feb 16;13(2):e0191581. doi: 10.1371/journal.pone.0191581 (PMC5815588; doi:10.1371/journal.pone.0191581)
Supplement: S1 File — Including RNA expression data and viral load data as well as site and E2 status. (XLSX) [file pone.0191581.s004.xlsx]

## Sheet: Viral and CDKN2A qRT-PCR data
hn_id	Group	Viral_Load_Score	GAPDH_CT_mean	E6_CT_mean	E7_CT_mean	E2_3PR_CT_mean	E2_5PR_CT_mean	ARF_CT_mean	INK4A_CT_mean
HN_1	Non-oro Disrupted	2	21.6955	14.1574	12.7114	11.9845	13.6603	6.50135	7.1346
HN_2	Non-oro D	2	20.0349	17.0336	Undet	17.207	16.658
HN_3	Non-oro D	3	21.4578	14.3951	12.9492	12.2222	13.898	11.1389	12.7787
HN_4	Non-oro D		No RNA
HN_5	Non-oro D		No RNA
HN_6	Non-oro D	2	21.8957	12.5642	12.8429	14.1655	14.9413
HN_7	Non-oro D	2	21.105	5.40922	5.79258	12.9244	15.3771
HN_8	Non-oro D		21.7685	14.3633	14.928	14.4645	15.0117	8.5322	10.1426
HN_9	Non-oro D		23.7195	11.7789	Undet	12.0846	11.7527
HN_10	Non-oro D	3	22.1377	10.8799	12.9321	Undet	14.3671	15.5021	14.6569
HN_11	Non-oro Intact	5	22.9389	5.98287	4.6512	5.98895	7.20949
HN_12	Non-oro I	4	22.5336	12.7055	13.4752	13.5525	14.23	15.9768	16.5312
HN_13	Non-oro I	4	19.7148	12.2154	12.5026	13.1383	14.5198
HN_14	Non-oro I	4	21.0975	Undet	15.8184	14.8753	Undet
HN_15	Non-oro I	5	20.9478	1.72019	1.33458	1.98063	-2.6125	7.32363	8.35108
HN_16	Oro Disrupted		19.5075	17.3675	15.8457	17.4415	17.5081	11.0299	11.539
HN_17	Oro D	1	21.4217	14.847	14.9411	14.8152	14.3399	14.3054	15.3768
HN_18	Oro D		21.9105	0.273335	1.50808	6.46895	2.9349	10.7195	9.89963
HN_19	Oro D	2	23.6325	10.1992	14.84	14.0402	13.4137
HN_20	Oro D	5	No RNA
HN_21	Oro D		No RNA
HN_22	Oro D	4	19.62	undet	undet	undet	undet	15.8066	16.5312
HN_23	Oro Intact	5	21.6052	0.810532	1.23893	1.64976	2.6365	9.02084	10.4999
HN_24	Oro I	5	22.5939	14.0028	3.20854	6.23091	5.60149	7.52785	5.41271
HN_25	Oro I	5	22.5754	1.14722	1.30396	0.539316	0.86887	8.52677	8.11196
HN_26	Oro I	5	25.8811	-0.70257	0.958593	-0.951765	1.94684	8.22718	4.52921
HN_27	Oro I	5	21.9486	-2.33043	-0.867598	3.00156	4.68689	8.94185	6.94408
HN_28	Oro I	4	23.1129	-1.5094	-2.22305	9.79865	9.3881	7.42155	5.77965
HN_29	Oro I	5	21.127	-2.07466	-2.07466	2.74528	4.23736	7.26227	8.94985
HN_30	Oro I	5	21.5397	2.18289	1.74791	3.12705	3.67321	9.7567	8.63933
HN_31	Oro I	5	24.5923	-3.44409	-2.45287	-1.02661	-0.779482	8.55831	10.1534
HN_32	Oro I	5	21.5766	0.715141	1.14439	0.709848	2.2189
HN_33	Oro I	5	19.2593	17.0948	6.66393	4.30641	7.47596	9.03725	9.86263
HN_34	Oro I	5	18.4929	3.03652	3.66749	6.79041	6.34349		8.75271
HN_35	Oro I		21.2833	2.53185	2.30358	4.25699	3.17847	7.0853	9.07993
HN_36	Oro I		19.7948	3.55597	3.1383	1.69247	4.14027	11.1954	10.2456
HN_37	Oro I		20.3077	1.08734	1.13263	0.534422	1.11762	11.2192	10.4515
HN_38	Oro I		No RNA
HN_39	Oro I		No RNA
HN_40	Oro I	2	22.6128	1.33024	1.71811	9.63535	9.27895
HN_41	Oro I	5	21.9123	1.67948	1.67079	1.67079	2.79116	4.67484	5.88393
HN_42	Oro I	5	21.2031	0.318136	-0.247187	9.34572	Undet	8.21523	7.33334
HN_43	Oro I	5	22.2569	0.249323	0.13628	1.65681	2.69158	8.35222	6.96989
